# Supplementary material for: Chronic Exposure to Nitric Oxide Induces P53 Mutations and Malignant-like Features in Human Breast Epithelial Cells
Source: MDPI journal article supplement (doi:10.3390/biom13020311), 2023-02-07
Supplement: s1 [file s1]

Supplemental Table S1. PCR TOPO cloning Primer Pairs Sequences and Amplicon Sizes.

# Supplemental Table 1

## PCR TOPO Cloning Primer Pair Sequences and Amplicon Sizes

| Gene   | Sequence                          | Exon | Amplicon Size |
|--------|-----------------------------------|------|---------------|
| KRAS   | Forward-GTGAGTTTGTATTAAAAGGTACTGG | 2    | 265 bp        |
|        | Reverse-GGTCCTGCACCAAGTAATATGC    |      |               |
| KRAS   | Forward-CCAGACTGTGTTTCTCCCTTC     | 3    | 286 bp        |
|        | Reverse-TGCATGGCATTAGCAAAGAC      |      |               |
| PIK3CA | Forward-CTGTGAATCCAGAGGGGAAA      | 9    | 269 bp        |
|        | Reverse-ACATGCTGAGATCAGCCAAA      |      |               |
| PIK3CA | Forward-CATTTGCTCCAAACTGACCA      | 20   | 389 bp        |
|        | Reverse-GGTCTTTGCCTGCTGAGAGT      |      |               |
| TP53   | Forward-CACTTGTGCCCTGACTTTCA      | 5    | 267 bp        |
|        | Reverse-AACCAGCCCTGTCGTCTCT       |      |               |
| TP53   | Forward-CTGCTCAGATAGCGATGGTG      | 6    | 251 bp        |
|        | Reverse-CTTAACCCCTCCTCCCAGAG      |      |               |
| TP53   | Forward-CTTGGGCCTGTGTTATCTCC      | 7    | 199 bp        |
|        | Reverse-GGGTCAGAGGCAAGCAGA        |      |               |
| TP53   | Forward-GGGAGTAGATGGAGCCTGGT      | 8    | 274 bp        |
|        | Reverse-TAACTGCACCCTTGGTCTCC      |      |               |

Supplemental Table S2. Quantitative Real-Time PCR Primer Pairs. Amplicon sizes are within the range from 80 to 250 bp.

## Supplemental Table 2

### Quantitative Real-Time PCR Primer Pairs

| Gene    | Sequence             |
|---------|----------------------|
| ALDH1A1 | CTCAAGGCCCTCAGATTGAC |
|         | GTTTGGCCCCTTCTTTCTTC |
| OCT4    | AGTGAGAGGCAACCTGGAGA |
|         | ACACTCGGACCACATCCTTC |
| CD44    | GGCGCAGATCGATTTGAATA |
|         | GAAAGCCTTGCAGAGGTCAG |
| CD133   | AATTCACCAGCAACGAGTCC |
|         | TCCAACAATCCATTCCCTGT |
| CD117   | AAGTGGATGGCACCTGAAAG |
|         | AGGGGCTGCTTCCTAAAGAG |
| CXCR4   | TTGTGCCCTTAGCCCACTAC |
|         | CACTTCCAATTCAGCAAGCA |
| NANOG   | CAGAAGGCCTCAGCACCTAC |
|         | ACTGGATGTTCTGGGTCTGG |
| RPL18   | GGATGATCCGGAAGATGAAG |
|         | CCGCACATCATCAGTTATGG |

## Supplemental Table S3. Summary of Identified Mutations.

## Supplemental Table 3

## Summary of Identified Mutations

| p53     |       | Exon 5                                            |                                                     |                                                     |                                                     |                                                   | Exon 6                                            |                                                     | Exon 7                                              |                                                     |                                                     |                                                     |                                                     | Exon 8                                              |                                                     |
|---------|-------|---------------------------------------------------|-----------------------------------------------------|-----------------------------------------------------|-----------------------------------------------------|---------------------------------------------------|---------------------------------------------------|-----------------------------------------------------|-----------------------------------------------------|-----------------------------------------------------|-----------------------------------------------------|-----------------------------------------------------|-----------------------------------------------------|-----------------------------------------------------|-----------------------------------------------------|
| Control | CDS   |                                                   |                                                     |                                                     |                                                     |                                                   |                                                   |                                                     | 703<br>c.703A>C<br>AAC>CAC<br>N235H<br>Substitution |                                                     |                                                     |                                                     |                                                     |                                                     |                                                     |
|         | Codon |                                                   |                                                     |                                                     |                                                     |                                                   |                                                   |                                                     |                                                     |                                                     |                                                     |                                                     |                                                     |                                                     |                                                     |
| 100 mM  | CDS   | 384<br>c.384T>C<br>CCT>CCC<br>P128P<br>Transition | 387<br>c.387C>T<br>GCC>GCT<br>A129A<br>Transition   | 386<br>c.386C>T<br>GCC>GTC<br>A129V<br>Transition   | 470<br>c.470T>G<br>GTC>GGC<br>V157G<br>Transversion |                                                   |                                                   | 590<br>c.590T>C<br>GTG>GCG<br>V197A<br>Transition   |                                                     |                                                     |                                                     |                                                     |                                                     |                                                     |                                                     |
|         | Codon |                                                   |                                                     |                                                     |                                                     |                                                   |                                                   |                                                     |                                                     |                                                     |                                                     |                                                     |                                                     |                                                     |                                                     |
| 300 mM  | CDS   | 384<br>c.384T>C<br>CCT>CCC<br>P128P<br>Transition | 388<br>c.388C>A<br>CTC>ATC<br>L130I<br>Transversion | 427<br>c.427G>C<br>GTG>CTG<br>V143L<br>Transversion | 436<br>c.436T>C<br>TGG>CGG<br>W146R<br>Transition   | 488<br>c.488A>G<br>TAC>TGC<br>Y163C<br>Transition | 537<br>c.537T>C<br>CAT>CAC<br>H179H<br>Transition | 658<br>c.658T>G<br>TAT>GAT<br>Y220D<br>Transversion | 703<br>c.703A>C<br>AAC>CAC<br>N235H<br>Substitution |                                                     |                                                     |                                                     |                                                     |                                                     |                                                     |
|         | Codon |                                                   |                                                     |                                                     |                                                     |                                                   |                                                   |                                                     |                                                     |                                                     |                                                     |                                                     |                                                     |                                                     |                                                     |
| 500 mM  | CDS   | 384<br>c.384T>C<br>CCT>CCC<br>P128P<br>Transition | 386<br>c.386C>T<br>GCC>GTC<br>A129V<br>Transition   |                                                     |                                                     |                                                   |                                                   | 658<br>c.658T>G<br>TAT>GAT<br>Y220D<br>Transversion | 688<br>c.688A>T<br>ACC>AGC<br>T230S<br>Substitution | 703<br>c.703A>C<br>AAC>CAC<br>N235H<br>Substitution | 710<br>c.710T>A<br>ATG>AAG<br>M237K<br>Substitution | 746<br>c.746G>C<br>AGG>ACG<br>R249T<br>Substitution | 751<br>c.751A>C<br>ATC>ATA<br>I251I<br>Substitution | 911<br>c.911C>A<br>ACC>AAC<br>T304N<br>Substitution | 914<br>c.914A>G<br>AAA>AGA<br>K305R<br>Substitution |
|         | Codon |                                                   |                                                     |                                                     |                                                     |                                                   |                                                   |                                                     |                                                     |                                                     |                                                     |                                                     |                                                     |                                                     |                                                     |

|              |    |
|--------------|----|
| Transition   | 10 |
| Transversion | 5  |
| Substitution | 9  |

| PIK3CA  |       | Exon 9                                                |                                                        |                                                        | Exon 20                                              |                                 |
|---------|-------|-------------------------------------------------------|--------------------------------------------------------|--------------------------------------------------------|------------------------------------------------------|---------------------------------|
| Control | CDS   | 1634<br>c.1634A>C<br>GAG>GCG<br>E545A<br>Transversion | 1658<br>c.1658delG<br>AGT>ACC<br>S553T<br>Substitution | 1659<br>c.1659T>C<br>Transition                        | 3088<br>c.3088A>G<br>ACT>GCT<br>T1030A<br>Transition |                                 |
|         | Codon |                                                       |                                                        |                                                        |                                                      |                                 |
| 100 mM  | CDS   | 1634<br>c.1634A>C<br>GAG>GCG<br>E545A<br>Transversion | 1658<br>c.1658delG<br>AGT>ACC<br>S553T<br>Substitution | 1659<br>c.1659T>C<br>Transition                        |                                                      |                                 |
|         | Codon |                                                       |                                                        |                                                        |                                                      |                                 |
| 300 mM  | CDS   | 1570<br>c.1570A>T<br>AGG>TGG<br>R524W<br>Transversion | 1658<br>c.1658delG<br>AGT>ACC<br>S553T<br>Substitution | 1659<br>c.1659T>C<br>Transition                        | 3088<br>c.3088A>G<br>ACT>GCT<br>T1030A<br>Transition | 3226<br>c.3226A>G<br>Transition |
|         | Codon |                                                       |                                                        |                                                        |                                                      |                                 |
| 500 mM  | CDS   | 1623<br>c.1623T>C<br>TCT>TCC<br>S541S<br>Transition   | 1634<br>c.1634A>C<br>GAG>GCG<br>E545A<br>Transversion  | 1658<br>c.1658delG<br>AGT>ACC<br>S553T<br>Substitution | 1659<br>c.1659T>C<br>Transition                      | 3224<br>c.3224A>G<br>Transition |
|         | Codon |                                                       |                                                        |                                                        |                                                      |                                 |

|              |   |
|--------------|---|
| Transition   | 9 |
| Transversion | 4 |
| Substitution | 4 |

| KRAS    |       | Exon 1                                         | Exon 2                                             |                                                  |                                                  |                                                  |
|---------|-------|------------------------------------------------|----------------------------------------------------|--------------------------------------------------|--------------------------------------------------|--------------------------------------------------|
| Control | CDS   | 89<br>c.89A>G<br>GAC>GGC<br>D30G<br>Transition | 144<br>c.144A>T<br>GGA>GGT<br>G48G<br>Transversion | 209<br>c.209A>G<br>CAG>CGG<br>E70R<br>Transition | 234<br>c.234T>C<br>TTT>TTC<br>F78F<br>Transition | 284<br>c.284A>G<br>CAT>CGT<br>H95R<br>Transition |
|         | Codon |                                                |                                                    |                                                  |                                                  |                                                  |
| 100 mM  | CDS   |                                                | 183<br>c.183A>G<br>CAA>CAG<br>Q61Q<br>Transition   |                                                  |                                                  |                                                  |
|         | Codon |                                                |                                                    |                                                  |                                                  |                                                  |
| 300 mM  | CDS   | 86<br>c.86T>C<br>GTG>GCG<br>V29A<br>Transition | 188<br>c.188A>G<br>GAG>GGG<br>E63G<br>Transition   |                                                  |                                                  |                                                  |
|         | Codon |                                                |                                                    |                                                  |                                                  |                                                  |
| 500 mM  | CDS   |                                                | 162<br>c.162T>C<br>GAT>GAC<br>D54D<br>Transition   | 285<br>c.285T>C<br>CAT>CAC<br>H95H<br>Transition |                                                  |                                                  |
|         | Codon |                                                |                                                    |                                                  |                                                  |                                                  |

|              |   |
|--------------|---|
| Transition   | 9 |
| Transversion | 1 |
| Substitution | 0 |

**Supplementary Figure S1:** Colony formation in SIT Media. Control and 100  $\mu$ M DETANO treated cells were evaluated for growth in serum-free media supplemented with 5 ng/ml selenium, 5 g/ml insulin, and 5 g/ml transferrin (SIT).  $1 \times 10^5$  cells were plated in 60 mm dishes with SIT media and maintained for three weeks. When compared to control, MCF10A cells previously maintained in 100 $\mu$ M DETANO formed colonies in the SIT media.

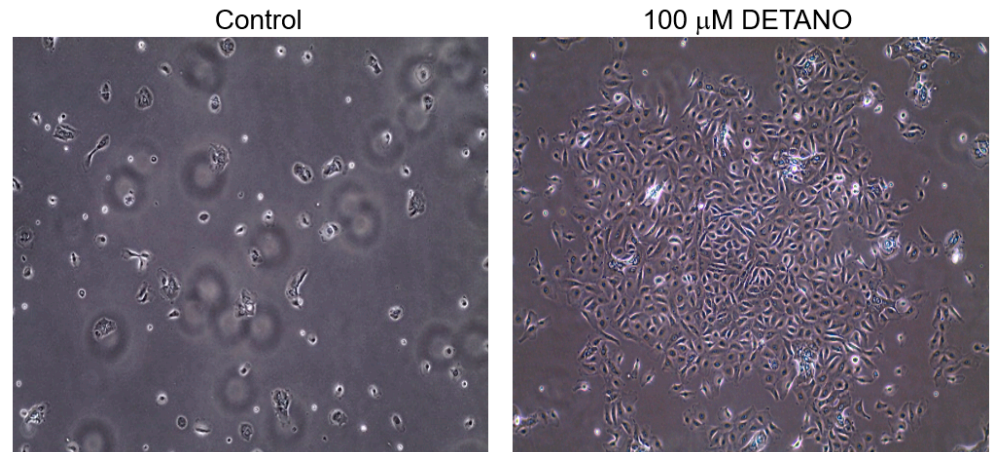

**Supplementary Figure S2: Cytogenetic Analyses.** Fig 4A. A dicentric Chr 1 composed by two Chr 1 long arm region 1, band 1; a derivative Chr 1; a translocation between Chr 3 short arm region 1, band 3 and Chr 9 short arm region 2, band 2; an isochromosome 8 form by two Chr 8 long arm region 1, band 1; a translocation involved partial Chr 9 Chr 3 & Chr 5; a deletion of Chr 21; and a translocation between Chr X short arm region 2, band 2 and Chr 21 long arm region 2, band 1. Fig 4B. Chromosome 21 was showed here in green by whole chromosome painting. The Chr 21 appeared normal in this FISH assay. TIMP1 is stained in orange. An Aqua X Control probe for region Xp13.2 stain. Fig 4C. Spectrum karyotyping of Control, 100 or 1000 mM DETANO treated MCF10A cells. Control: 47, XX, del (1), +i (1q), del (3), add (8), der (9) t (5; 3; 9). 100 uM: 47, XX, dic(1;1)(q11;q11), +der(1),t(3;9)(p13;p22), der(8) i(8)(q11;q11), t(5;3;9). 1000 uM: 47, XX, dic(1;1)(q11;q11), +der(1), t(3;9)(p13;p22), i(8)(q11;q11), t(3;5;9).

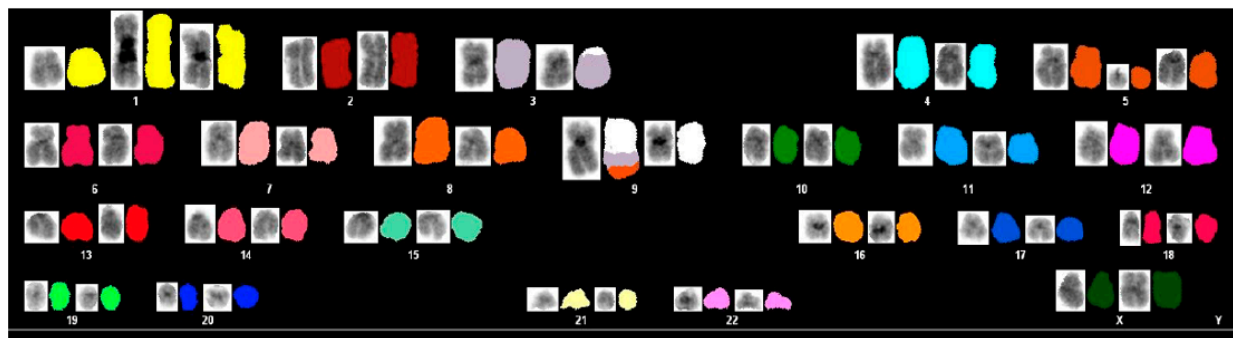

Control untreated; 47,XX, dic(1;1)(q11;q11),+der(1),-1,-3,t(3;9)(p13;22),-5,del(5),-8,i(8)(q11;q11),-9,t(9;3;5)

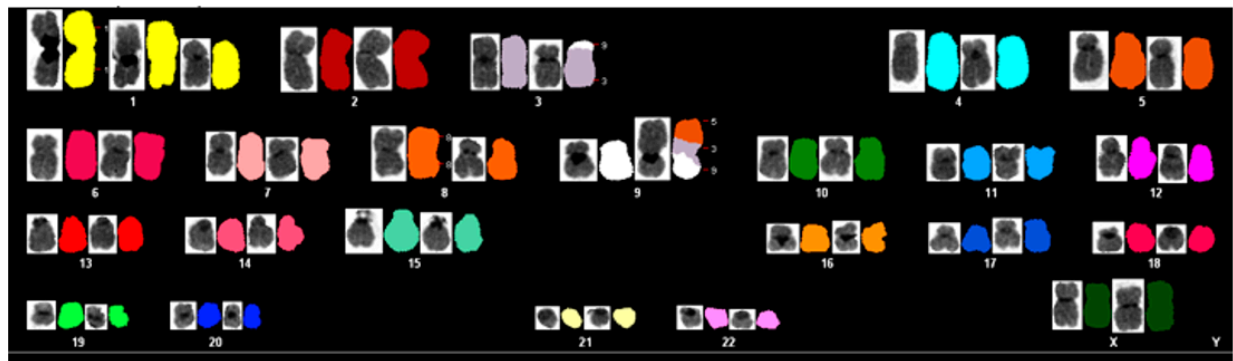

100 uM: 47, XX, dic(1;1)(q11;q11),+der(1),t(3;9)(p13;p22), der(8) i(8)(q11;q11), t(5;3;9)

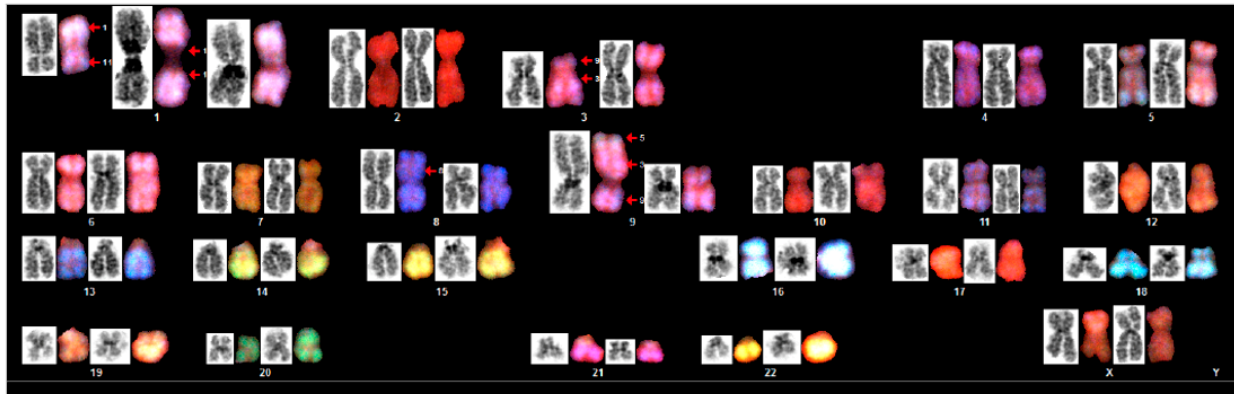

2-1 100 uM: 47,XX, der(1) t(1;11),+dic(1q;1q),der(3)t(9;3),der(8),der(9)t(9;3;5)

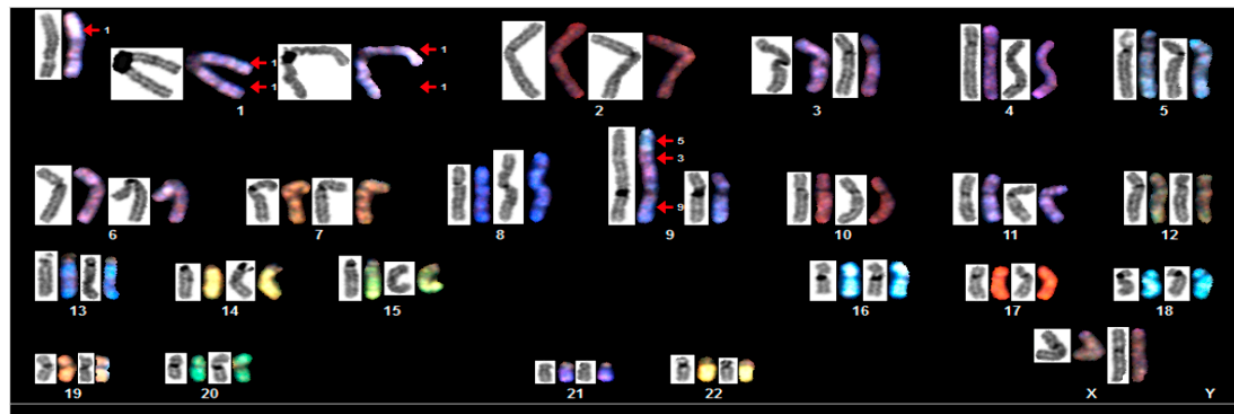

2-2 100 uM: 47,XX, der(1),+(1q), dek(3),der(8),t(9:3:5)

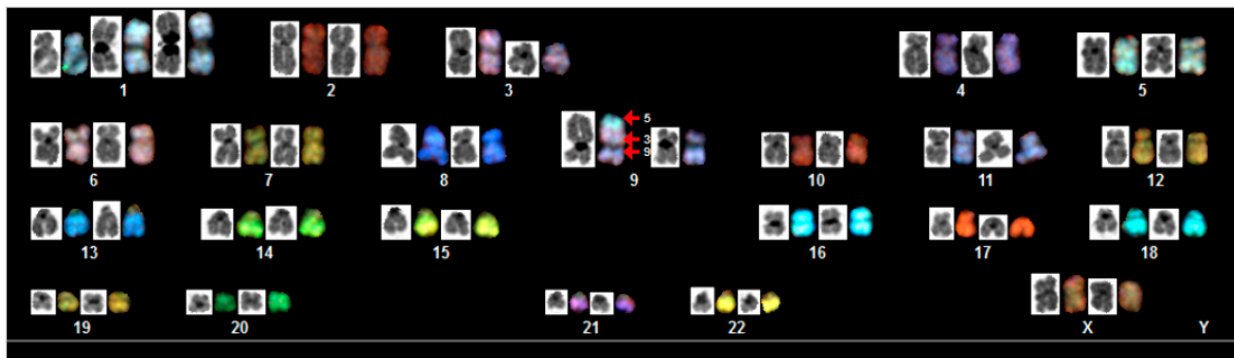

2-3 100 uM: 47,XX, der(1),+dic(1q;1q),der(3)t(9;3),der(8),der(9)t(9:3:5)
